# Supplementary material
Source: PubMed Central journal article supplement (PMC8220772)
Supplement: 43058_2021_168_MOESM1_ESM.pdf [file 43058_2021_168_MOESM1_ESM.pdf]

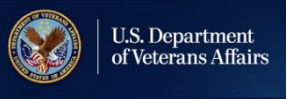

**CONCERT Learning Intensive 3 – Learning Session 1 (LS1)**  
**Action Planning Session 1 – Watch List Huddles (WLH)**  
**Day 2: 8:00-8:45am**

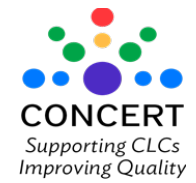

**Overall Action Period 1 (Jan 13-Feb 5) Assignment: Have WLH up and running in every neighborhood by Learning Session 2 (Feb 6)**

| Time        | Discussion Items                                                                                                                                                                                                                                                                                                                                                                                            | Action Plan: Who will do what when                                                                               |
|-------------|-------------------------------------------------------------------------------------------------------------------------------------------------------------------------------------------------------------------------------------------------------------------------------------------------------------------------------------------------------------------------------------------------------------|------------------------------------------------------------------------------------------------------------------|
| 8:00 – 8:05 | <p>Make assignments of roles, (<i>you will rotate these roles throughout the learning intensive</i>):</p> <ol style="list-style-type: none"> <li>1. Facilitator</li> <li>2. Notetaker</li> <li>3. Timekeeper</li> <li>4. Team Spokesperson</li> </ol> <p>Review agenda.</p> <p>In a quick go round share ideas you got from mixed tables.</p>                                                               | <p>Facilitator:</p> <p>Notetaker:</p> <p>Timekeeper:</p> <p>Team Spokesperson:</p>                               |
| 8:05 – 8:10 | <p>In a go-round:</p> <ol style="list-style-type: none"> <li>1. Share your lists of residents you’re concerned about and why.</li> <li>2. Share your lists of situations that would put someone on the Watch List and add residents accordingly.</li> </ol> <p>Together agree on a first draft Watch List.<br/> <i>Remember your nurse managers and neighborhood staff will add to this watch list.</i></p> | <p><u>First Draft Watch List Includes: (use initials)</u></p>                                                    |
| 8:10 – 8:20 | <p>How will you introduce/bring WLHs to:</p> <ol style="list-style-type: none"> <li>1. Nurse Managers (within 3 business days)</li> <li>2. VAMC leadership (Week 1)</li> <li>3. Other Service lines (by Week 2)</li> </ol>                                                                                                                                                                                  | <p><u>Dates/Times to bring WLHs to:</u></p> <p>Nurse Managers:</p> <p>VAMC Leadership:</p> <p>Service Lines:</p> |

*Action Planning should be continued and revised as you return to your CLCs and get feedback from staff.*

| Time           | Discussion Items                                                                                                                                                                                                                                                                                                                                                                                                                                                              | Action Plan: Who will do what when                                                                                                                                                                                                                                                                                                            |
|----------------|-------------------------------------------------------------------------------------------------------------------------------------------------------------------------------------------------------------------------------------------------------------------------------------------------------------------------------------------------------------------------------------------------------------------------------------------------------------------------------|-----------------------------------------------------------------------------------------------------------------------------------------------------------------------------------------------------------------------------------------------------------------------------------------------------------------------------------------------|
|                | What content will you share?                                                                                                                                                                                                                                                                                                                                                                                                                                                  | <u>Agenda/Content/Roles/Etc.</u>                                                                                                                                                                                                                                                                                                              |
| 8:20 –<br>8:30 | <p>How will you pilot WLH within the next 5 working days?</p> <p><i>Remember your nurse managers and neighborhood staff will help with these decisions.</i></p> <p>To do this you need to:</p> <ul style="list-style-type: none"> <li>- Determine which neighborhood to pilot</li> <li>- Determine the best time and location</li> <li>- Introduce WLH to your staff</li> <li>- Take notes during WLH</li> <li>- Provide coverage so your staff are free to attend</li> </ul> | <p>Pilot Neighborhood:</p> <p>What do you think is the best day/time and location for WLH pilot:</p> <p>How will you get feedback from staff about the best day/time and location for WLH:</p> <p>How do you plan to introduce WLH to Staff:</p> <p>How do you plan to take notes during WLH:</p> <p>How do you plan to provide coverage:</p> |

*Action Planning should be continued and revised as you return to your CLCs and get feedback from staff.*

| Time | Discussion Items                                                                                                                                                                                                                                                                                                                                                                                                                                                    | Action Plan: Who will do what when                                                                                                                                                                                                                                                                                                                                                                     |
|------|---------------------------------------------------------------------------------------------------------------------------------------------------------------------------------------------------------------------------------------------------------------------------------------------------------------------------------------------------------------------------------------------------------------------------------------------------------------------|--------------------------------------------------------------------------------------------------------------------------------------------------------------------------------------------------------------------------------------------------------------------------------------------------------------------------------------------------------------------------------------------------------|
|      | <p>It is important for the LI Leadership team to attend the huddles. Determine who from the LI Leadership team will attend which huddles.</p> <p>By week 2, you need to hold WLHs in all neighborhoods during day tours.</p> <p>You will need to mentor Nurse Managers, observe and develop their skills.</p> <p>You will need to engage all tours in WLH by Feb. 6</p> <p>You will need to follow up on action items that require action across service lines.</p> | <p>LI Leadership team huddle assignments:</p> <p>How will you roll out WLH to day tour on all the neighborhoods by the end of Week 2:</p> <p>How will you mentor Nurse Managers in leading WLH:</p> <p>What process will you use to roll out WLH to all neighborhoods, all tours by Feb 6:</p> <p>What process will you use to follow up on action items that require action across service lines?</p> |

*Action Planning should be continued and revised as you return to your CLCs and get feedback from staff.*

| Time        | Discussion Items                                                                                                                                                                                                                                                                                                                                                                                                                                                                                                                                                                                                                                                                                                                                                                                                                                              | Action Plan: Who will do what when                                                                                                                    |
|-------------|---------------------------------------------------------------------------------------------------------------------------------------------------------------------------------------------------------------------------------------------------------------------------------------------------------------------------------------------------------------------------------------------------------------------------------------------------------------------------------------------------------------------------------------------------------------------------------------------------------------------------------------------------------------------------------------------------------------------------------------------------------------------------------------------------------------------------------------------------------------|-------------------------------------------------------------------------------------------------------------------------------------------------------|
| 8:30 – 8:35 | <p>To oversee this process, the four of you will need to meet weekly. When and where will the four of you meet to oversee this process?</p> <p><i>Remember the four of you will likely have impromptu/informal check-ins about WLHs throughout the week. This meeting is to set aside time to formally discuss your progress and next steps.</i></p>                                                                                                                                                                                                                                                                                                                                                                                                                                                                                                          | <p><u>LI Leadership Team Weekly Meeting</u></p> <p>When:</p> <p>Where:</p>                                                                            |
| 8:35 – 8:45 | <p>Create your CLC Storyboard (you will have 3 minutes to present this information at the VISN sharing session 8:50 – 10:00)</p> <ul style="list-style-type: none"> <li>▶ Tell us about the community your VAMC is in</li> <li>▶ Tell us about your CLC: <ul style="list-style-type: none"> <li>▶ How many Veterans do you serve?</li> <li>▶ What types of care do you provide?</li> <li>▶ How many neighborhoods do you have and what types of care do you provide?</li> <li>▶ Describe the living space Veterans have</li> </ul> </li> <li>▶ Each LI team member introduce yourself <ul style="list-style-type: none"> <li>▶ What is your role?</li> <li>▶ How long have you been in this role?</li> <li>▶ What do you like most about your job?</li> </ul> </li> <li>▶ Our biggest strengths are:</li> <li>▶ Our biggest improvement needs are:</li> </ul> | <p>Community:</p> <p># of Veterans:</p> <p># of Neighborhoods and types of care:</p> <p>Living space:</p> <p>Strengths:</p> <p>Improvement Needs:</p> |
| 8:45 – 8:50 | <p><i>Find your VISN meeting – use seating legend</i></p>                                                                                                                                                                                                                                                                                                                                                                                                                                                                                                                                                                                                                                                                                                                                                                                                     | <p><i>VISN meeting starts at 8:50</i></p>                                                                                                             |

*Action Planning should be continued and revised as you return to your CLCs and get feedback from staff.*

Use this grid for notes during your VISN sharing session

| CLC | Good Ideas | Red Flags | Questions |
|-----|------------|-----------|-----------|
|     |            |           |           |
|     |            |           |           |
|     |            |           |           |
|     |            |           |           |
|     |            |           |           |
|     |            |           |           |
|     |            |           |           |
|     |            |           |           |

*Action Planning should be continued and revised as you return to your CLCs and get feedback from staff.*
